1 **Modality-specific and multisensory mechanisms of spatial attention and expectation**

2

3 Authors: Arianna Zuanazzi<sup>1,2</sup>, Uta Noppeney<sup>1,3</sup>

4

5 <sup>1</sup>Computational Neuroscience and Cognitive Robotics Centre, University of Birmingham,

6 UK; <sup>2</sup>Department of Psychology, New York University, New York, NY, USA; <sup>3</sup>Donders

7 Institute for Brain, Cognition and Behaviour, Radboud University, Nijmegen, The

8 Netherlands

9

10

11 Corresponding author: Arianna Zuanazzi, Department of Psychology, New York University,

12 New York, NY, USA, email: az1864@nyu.edu

13

14 Number of words: 10917

15

16  
17  
18  
19  
20  
21  
22  
23  
24  
25  
26  
27  
28  
29  
30  
31  
32  
33  
34  
35  
36  
37  
38  
39  
40

## Abstract

In our natural environment, the brain needs to combine signals from multiple sensory modalities into a coherent percept. While spatial attention guides perceptual decisions by prioritizing processing of signals that are task-relevant, spatial expectations encode the probability of signals over space. Previous studies have shown that behavioral effects of spatial attention generalize across sensory modalities. However, because they manipulated spatial attention as signal probability over space, these studies could not dissociate attention and expectation or assess their interaction.

In two experiments, we orthogonally manipulated spatial attention (i.e., task-relevance) and expectation (i.e., signal probability) selectively in one sensory modality (i.e., primary modality) (experiment 1: audition, experiment 2: vision) and assessed their effects on primary and secondary sensory modalities in which attention and expectation were held constant.

Our results show behavioral effects of spatial attention that are comparable for audition and vision as primary modalities; yet, signal probabilities were learnt more slowly in audition, so that spatial expectations were formed later in audition than vision. Critically, when these differences in learning between audition and vision were accounted for, both spatial attention and expectation affected responses more strongly in the primary modality in which they were manipulated, and generalized to the secondary modality only in an attenuated fashion. Collectively, our results suggest that both spatial attention and expectation rely on modality-specific and multisensory mechanisms.

## Keywords

Attention, expectation, multisensory, perceptual inference and learning, space

## 41 **Introduction**

42

43 Spatial attention is a top-down mechanism that is critical for the selection of task-relevant  
44 information. It facilitates perception (e.g., faster reaction times, greater accuracy) of signals  
45 presented at the attended location (Carrasco, 2011; van Ede et al., 2012). By contrast, spatial  
46 expectation (signal probability) facilitates perception by encoding the statistical structure of  
47 the environment (Summerfield & Egner, 2009; Rohenkohl et al., 2014). In everyday life,  
48 spatial attention and expectation are closely intertwined. For instance, observers often  
49 allocate attentional resources to locations in space where events are more likely to occur  
50 (Summerfield & Egner, 2009; Feldman & Friston, 2010 for further discussion within the  
51 predictive coding framework).

52 Importantly, in our natural multisensory environment our brain is constantly exposed to  
53 auditory and visual signals. This raises the critical question of whether allocation of attention  
54 and encoding of signal probability are performed in a modality-specific fashion or  
55 interactively across sensory modalities. Previous research has suggested that spatial attention  
56 relies on cognitive resources that are partially shared across sensory modalities (Eimer &  
57 Driver, 2001; Wahn & König 2015, 2017). For instance, Spence & Driver (1996)  
58 manipulated spatial attention by presenting signals with a higher probability in the attended  
59 relative to unattended hemifield in one modality only (i.e., primary modality). They showed  
60 behavioral facilitation for signals presented at the attended location not only for the primary  
61 modality (e.g., audition) but also for the secondary modality (e.g., vision) in which spatial  
62 attention was not explicitly manipulated. Likewise, neuroimaging studies showed increased  
63 activations for signals presented at the attended location not only in the primary modality in  
64 which attention was manipulated but also in the secondary modality (Eimer & Schröger,  
65 1998; Eimer, 1999; Macaluso et al., 2002; Santangelo et al., 2009; Zuanazzi & Noppeney,

66 2019). Crucially, in this past work the attentional effects were greater in the primary than in  
67 the secondary modality (Spence & Driver, 1996; Mondor & Amirault, 1998). The attenuated  
68 generalization across sensory modalities suggests that attentional resources are not  
69 supramodal, but partially shared (Driver & Spence, 1998). However, this past research  
70 conflated attention and expectation by manipulating spatial attention via probabilistic spatial  
71 cues or changes in signal probability (Posner, 1980; Spence & Driver, 1996, 1997; Macaluso  
72 et al., 2002; Kincade et al., 2005; Bressler et al., 2008; Santangelo et al., 2009). Notably, the  
73 Posner probabilistic cuing paradigm shifts observers' attention via spatial cues that indicate  
74 whether a target is, for instance, more likely to appear in the left or right hemifield. Likewise,  
75 manipulating not only categorically whether the cue is valid or invalid but also its validity  
76 (e.g., 100% vs 60% valid) (Vossel et al., 2006; Doricchi et al., 2010; Macaluso & Doricchi,  
77 2013) does not enable the dissociation of spatial attention and expectation. Observers should  
78 allocate their attentional resources more to their left hemifield when presented with a cue that  
79 indicates with a probability of 1 rather than 0.6 whether the target is likely to be presented in  
80 the left hemifield.

81 Thus, the first question of this study is whether spatial attention and/or expectation generalize  
82 across sensory modalities to a similar extent, when they are manipulated independently. In  
83 the most extreme case, they may be modality-specific (i.e., no generalization) or amodal (i.e.,  
84 complete generalization). A recent neuroimaging study, for instance, suggested that spatial  
85 attention relies mainly on frontoparietal cortices for both primary and secondary modalities,  
86 while spatial expectations are formed in sensory systems selectively for the primary modality  
87 (Zuanazzi & Noppeney, 2019). As a consequence, we would expect spatial signal probability  
88 to be encoded selectively for the primary modality and to generalize to a secondary modality  
89 only to a limited degree.

90 A second unresolved question is whether the generalization across sensory modalities  
91 depends on whether attention and expectation are manipulated in the auditory or visual  
92 modalities as primary manipulation modality – i.e., on the direction of cross-sensory  
93 generalization. Previous studies of multisensory attention have indeed shown asymmetric  
94 multisensory generalization, depending on which modality was manipulated as primary  
95 modality (Ward et al., 2000; Greene et al., 2001; Molholm et al., 2007). Moreover, one may  
96 expect differences in cross-sensory generalization from vision to audition and vice versa  
97 because spatial representations and expectations are encoded differently in audition and  
98 vision. Visual and auditory systems encode space via different reference frames (i.e., eye-  
99 centered vs head-centered) and representational formats. In the visual system, spatial location  
100 is directly encoded in the sensory epithelium and later in a place code, i.e., via retinotopic  
101 organization of primary and higher order visual cortices (e.g., Sereno et al., 1995; Maier &  
102 Groh, 2009). In the auditory system, spatial locations are computed from binaural and  
103 monaural cues in the brain stem and are represented in a hemifield code in primary auditory  
104 cortices (e.g., Lauter et al., 1985; Maier & Groh, 2009). Further, in everyday life under  
105 normal lighting conditions, vision usually provides more reliable spatial information than  
106 audition and therefore often dominates spatial perception (Spence & Driver, 1997; Aller et  
107 al., 2015; Odegaard et al., 2015; Rohe & Noppeney, 2015a, 2015b, 2016, 2018; Aller &  
108 Noppeney, 2019; Jones et al., 2019; Meijer et al., 2019). As a result, we would expect the  
109 generalization of spatial attention and expectation to depend on whether attention and  
110 expectation are manipulated primarily in vision or audition.

111 Third, in everyday life spatial expectations are formed when observers implicitly learn the  
112 statistical structure of their multisensory environment such as the probability of signals  
113 occurring at a particular location. Because spatial information is encoded less reliably in  
114 audition than vision, this learning may be faster in vision than in audition. Thereby spatial

115 expectations may also be affected by multisensory processes in perceptual learning (e.g., Kim  
116 et al., 2008; Batson et al., 2011). For instance, previous studies suggested that perceptual  
117 learning in temporal discrimination tasks generalizes across sensory modalities (Warm et al.,  
118 1975; Nagarajan et al., 1998; Meegan et al. 2000; Bratzke et al., 2012; Bueti et al., 2012,  
119 2014; but see Lapid et al., 2009). This study will investigate how observers dynamically form  
120 spatial expectations by learning signal probability over time (Crist et al., 1997).

121 In two experiments (within participants), we orthogonally manipulated spatial attention and  
122 expectation selectively in one sensory modality as primary modality (experiment 1: audition,  
123 experiment 2: vision). Crucially, to dissociate spatial attention and expectation we did not use  
124 a probabilistic cuing paradigm. Instead, we manipulated observers' spatial attention in the  
125 primary (experiment 1: audition, experiment 2: vision) modality by instructing them to attend  
126 and respond to, e.g., auditory targets selectively in their left but not right hemifield. In  
127 addition, we manipulated the relative frequency of auditory stimuli in the left (e.g., 30%) and  
128 right (e.g., 70%) hemifield. Because observers need to respond only to targets in their left  
129 hemifield, they should ideally allocate all attentional resources to this task-relevant hemifield  
130 irrespective of stimulus frequency. Moreover, observers had to respond to all stimuli in their  
131 secondary (e.g., visual) modality irrespective of the hemifield in which they were presented.  
132 These visual stimuli were presented equally often in both hemifields. We then assessed the  
133 effects of spatial attention and expectation in the primary modality and how they generalize  
134 crossmodally to signals in the secondary sensory modality, in which spatial attention and  
135 expectation were not explicitly manipulated (experiment 1: vision, experiment 2: audition).

136 If attention, expectation and decision making rely on modality-specific processing streams  
137 (i.e., without any multisensory interplay), we would expect as null-hypothesis that the  
138 attention and expectation manipulations in the primary modality would not affect response  
139 times to stimuli in the secondary modality. Hence, the alternative hypothesis is that both

140 spatial attention and expectations rely on mechanisms that are partially shared across sensory  
141 modalities and the generalization of spatial attention and expectation depends on whether  
142 they are manipulated in audition or vision as primary modalities (Spence & Driver, 1997;  
143 Ward et al., 2000; Greene et al., 2001; Molholm et al., 2007; Aller et al., 2015; Odegaard et  
144 al., 2015; Rohe & Noppeney, 2015a, 2015b, 2016, 2018; Aller & Noppeney, 2019; Jones et  
145 al., 2019; Meijer et al., 2019).

146

147

## 148 **Materials and Methods**

149

### 150 **Participants**

151 Twenty-eight healthy subjects (19 females; mean age = 25.57 years; 24 right-handed)  
152 participated in the study (experiment 1 and experiment 2, within participants). The sample  
153 size was determined based on previous studies that investigated attention/expectation  
154 (Doherty et al., 2005; van Ede et al., 2012; Beck et al., 2014; Rohenkohl et al., 2014) and/or  
155 multisensory integration (Spence & Driver, 1996, 1997; Eimer et al., 2004; Santangelo et al.,  
156 2008; Krumbholz et al., 2009; Mengotti et al., 2018; Zuanazzi & Noppeney, 2018).

157 All participants had normal or corrected to normal vision and reported normal hearing. All  
158 participants provided written informed consent and were naïve to the aim of the study. The  
159 study was approved by the local ethics committee of the University of Birmingham (Science,  
160 Technology, Mathematics and Engineering (STEM) Ethical Review Committee) and the  
161 experiment was conducted in accordance with these guidelines and regulations.

162

163

164

165 **Stimuli and Apparatus**

166 Spatial auditory stimuli of 100 ms duration were created by convolving bursts of white noise  
167 (with 5 ms onset and offset ramps) with spatially selective head-related transfer functions  
168 (HRTFs) based on the KEMAR dummy head of the MIT Media Lab  
169 (<http://sound.media.mit.edu/resources/KEMAR.html>). Visual stimuli ('flashes') were white  
170 discs (radius:  $0.88^\circ$  visual angle, luminance: 196 cd/m<sup>2</sup>) of 100 ms duration presented on a  
171 grey background. Both auditory and visual stimuli were presented at  $\pm 10^\circ$  of horizontal visual  
172 angle along the azimuth ( $0^\circ$  of vertical visual angle). Throughout the entire experiment, a  
173 fixation cross was presented in the center of the screen.

174 Prior to the beginning of the study, participants were tested for their ability to discriminate  
175 left and right auditory stimuli on a brief series of 20 trials. They indicated their spatial  
176 discrimination response (i.e., 'left' vs 'right') via a two-choice key press (group mean  
177 accuracy was  $99\% \pm 0.4\%$  [across subjects mean  $\pm$  SEM]).

178 During the experiment, participants rested their chin on a chinrest with the height held  
179 constant across all the participants. Auditory stimuli were presented at approximately 72 dB  
180 SPL, via HD 280 PRO headphones (Sennheiser, Germany). Visual stimuli were displayed on  
181 a gamma-corrected LCD monitor (2560 x 1600 pixels resolution, 60 Hz refresh rate, 30" Dell  
182 UltraSharp U3014, USA), at a viewing distance of approximately 50 cm from the  
183 participant's eyes. Stimuli were presented using Psychtoolbox version 3 (Kleiner et al., 2007;  
184 [www.psychtoolbox.org](http://www.psychtoolbox.org)), running under Matlab R2014a (Mathworks Inc., Natick, MA, USA)  
185 on a Windows machine. Participants' responses were recorded via one key of a small keypad  
186 (Targus, USA). Throughout the study, participants' eye-movements and fixation were  
187 monitored using Tobii Eyex eyetracking system (Tobii EyeX, Tobii, Sweden, ~60 Hz  
188 sampling rate).

189



190 **Study overview: rationale and analysis strategy**

191 This study included two experiments. Each experiment conforms to a four-factorial design.

192 Because the two experiments were performed within the same participants, the study as a

193 whole could also be treated as a five factorial within-subject experiment. However, because

194 (1) experiment 1 and 2 were completed on different days, (2) experiment 1 was a replication

195 of our previous study and (3) the understanding of results of five factorial designs is rather

196 complex, we will initially analyse each of the two experiments separately.

197 The separate analyses of experiments 1 and 2 allow us to address our first question, i.e.,

198 whether spatial attention and expectations rely on modality-specific or at least partially

199 shared mechanisms. While experiment 1 is intended to replicate our findings reported in our

200 previous research (Zuanazzi & Noppeney, 2018), experiment 2 is intended to extend them

201 and demonstrate that this pattern of results does not depend on whether audition or vision is

202 used as a primary manipulation modality. Moreover, showing the same profile across the two

203 experiments also resolves the ambiguity of our previous research, in which a smaller spatial

204 expectation effect for the secondary (i.e., visual) modality in experiment 1 could potentially

205 be explained by differences in sensory modality rather than attenuated cross-sensory

206 generalization.

207 In a second step we will directly combine data from experiment 1 and 2 to address our second

208 question, i.e., whether the spatial expectation effect generalizes differently from audition to

209 vision than from vision to audition. To address this question, we need to compare the

210 expectation effects for auditory and visual stimuli in the attended hemifield between the two

211 experiments (i.e., this question cannot be addressed by any of the two experiments alone).

212 Please also note that the Design and Procedure section mostly overlaps with that of our

213 previous paper (Zuanazzi & Noppeney, 2018) to enable the reader to quickly compare our

214 different studies and obtain a convergent picture across all results.

## 215 **Design and Procedure**

216 In two experiments, participants were presented with auditory and visual stimuli in their left  
217 and right hemifields. To manipulate spatial attention, they were instructed to respond to  
218 stimuli in the primary sensory (e.g., auditory) modality selectively in one (i.e., task-relevant)  
219 hemifield and ignore stimuli in the task-irrelevant hemifield. Moreover, we manipulated  
220 observers' spatial expectations by presenting stimuli in the primary sensory modality with  
221 different probabilities in the task-relevant and irrelevant hemifields. In their secondary (e.g.,  
222 visual) modality, observers had to respond to all stimuli that were presented equally often in  
223 both hemifields (Fig. 1A and 1B). Experiment 1 investigated the effect of auditory spatial  
224 attention and expectation on detection of auditory (i.e., primary modality) and visual (i.e.,  
225 secondary modality) targets using a 2 (auditory spatial attention: left vs right hemifield) x 2  
226 (auditory spatial expectation: left vs right hemifield) x 2 (stimulus modality: auditory vs  
227 visual) x 2 (stimulus location: left vs right hemifield) factorial design. Hence, experiment 1  
228 manipulated spatial attention and expectation selectively in audition and assessed their direct  
229 effects on auditory stimulus processing and indirect generalization to visual stimuli. In  
230 experiment 2 primary and secondary modality were reversed (i.e., primary modality: vision;  
231 secondary modality: audition); design and procedural details were otherwise comparable to  
232 experiment 1. For the data analysis we pooled over stimulus locations (left/right) leading to a  
233 2 (auditory spatial attention: attended vs unattended) x 2 (auditory spatial expectation:  
234 expected vs unexpected) x 2 (stimulus modality: auditory vs visual) factorial design.

235 Spatial attention was manipulated for the primary modality as task-relevance, i.e., the  
236 requirement to respond to an auditory (experiment 1) or a visual (experiment 2) target in the  
237 left vs right hemifield. Prior to each run a cue (duration: 2000 ms) informed the observer  
238 whether to respond to targets in either their left or right hemifield.

239 Spatial expectation was manipulated as spatial signal probability for signals in the primary  
240 modality across experimental sessions that were performed on different days. Auditory (i.e.,  
241 primary modality in experiment 1) or visual (i.e., primary modality in experiment 2) signals  
242 were presented with a ratio of 2.33/1 (i.e., 70%/30%) in the expected/unexpected hemifield.  
243 Observers were not informed about those probabilities but learnt them implicitly.  
244 Importantly, spatial attention and expectation were not directly manipulated in the secondary  
245 modality, allowing us to assess their cross-sensory generalization. As a result, participants  
246 needed to respond to all visual targets that were presented with equal probabilities in their  
247 spatial hemifields in experiment 1 (i.e., ratio 1/1 in the expected/unexpected hemifields) (Fig.  
248 1A and 1C). Likewise, they had to respond to all auditory targets that were presented with  
249 equal probabilities in experiment 2.

250 Each experiment included two sessions (i.e., spatial expectation left vs right on different  
251 days). Hence, subjects participated in the two experiments on four days separated by at least  
252 2 to a maximum of 10 days: 2 sessions for experiment 1 and 2 sessions for experiment 2 = 4  
253 sessions in total for each participant. Each session included 12 attention runs. Runs were of  
254 two types: in run type A (Fig. 1A, 1C and 1D) spatial attention and expectation were  
255 congruent (i.e., spatial attention was directed to the hemifield with higher stimulus  
256 frequency); in run type B spatial attention and expectation were incongruent (i.e., spatial  
257 attention was directed to the hemifield with less frequent stimuli). The overall probability to  
258 respond (i.e., response probability) was greater when attention and expectation were  
259 congruent and directed to the same hemifield (85%, runs of type A) than when they were  
260 directed to different hemifields (65%, runs of type B) (Fig. 1D).

261 The order of experiments 1 vs 2 and of expectation sessions (i.e., left vs right) was  
262 counterbalanced across participants; the order of attention runs (i.e., left vs right) was  
263 counterbalanced within and across participants and the order of stimulus locations (i.e., left vs

264 right) and stimulus modalities (sound vs flash) was pseudo-randomized within each  
265 participant. Brief breaks were included after every two attention runs to provide feedback to  
266 participants about their performance accuracy (averaged across all conditions) in the target  
267 detection task and about their eye-movements (i.e., fixation maintenance).

268 Overall, each experiment included 80 trials x 12 attention runs (6 runs of type A and 6 runs of  
269 type B, duration: 3 mins/run) x 2 expectation sessions = 1920 trials in total (and 3840 for the  
270 whole study). Specifically, each run type included i. 336 targets presented in the expected  
271 hemifield (pooled over left and right) and 144 targets in the unexpected hemifield (pooled  
272 over left and right) for the primary modality and ii. 240 targets presented in the expected  
273 hemifield and 240 targets in the unexpected hemifield (pooled over left and right) for the  
274 secondary modality. For further details see Fig. 1C which shows the absolute number of trials  
275 for each condition and run type.

276 Each trial (SOA: 2300 ms) included three time windows: i. fixation cross alone (700 ms  
277 duration), ii. brief sound or flash (stimulus duration: 100 ms) and iii. fixation cross alone  
278 (1500 ms as response interval, see Fig. 1B). Participants responded to the targets in the  
279 primary modality presented in the attended hemifield and to all targets in the secondary  
280 modality irrespective of hemifield via key press, with their index finger (i.e., the same  
281 response for all auditory and visual stimuli) as fast and accurately as possible (Fig. 1B).

282 Prior to each session, participants were familiarized with the stimuli in brief practice runs  
283 (with equal spatial signal probability) and trained on target detection performance and  
284 fixation (i.e., a warning signal was shown when the disparity between the central fixation  
285 cross and the eye-data samples exceeded 2.5 degrees).

286 After the final session (i.e., experiment 1 for 14 participants and experiment 2 for the other 14  
287 participants), participants indicated in a questionnaire whether they thought the stimuli in the  
288 primary modality were presented more frequently in one of the two spatial hemifields. Ten

289 out of 14 participants in experiment 1 and 11 out of 14 participants in experiment 2 correctly  
290 identified the expectation manipulation in the primary modality. Moreover, 13 out of 14  
291 participants in experiment 1 and 13 out of 14 participants in experiment 2 correctly reported  
292 that stimuli in the secondary modality were presented with equal probabilities across the two  
293 hemifields. These data suggest that the majority of participants were aware of the  
294 manipulation of signal probability at least at the end of the fourth session.

## Experiment 1 (audition to vision)

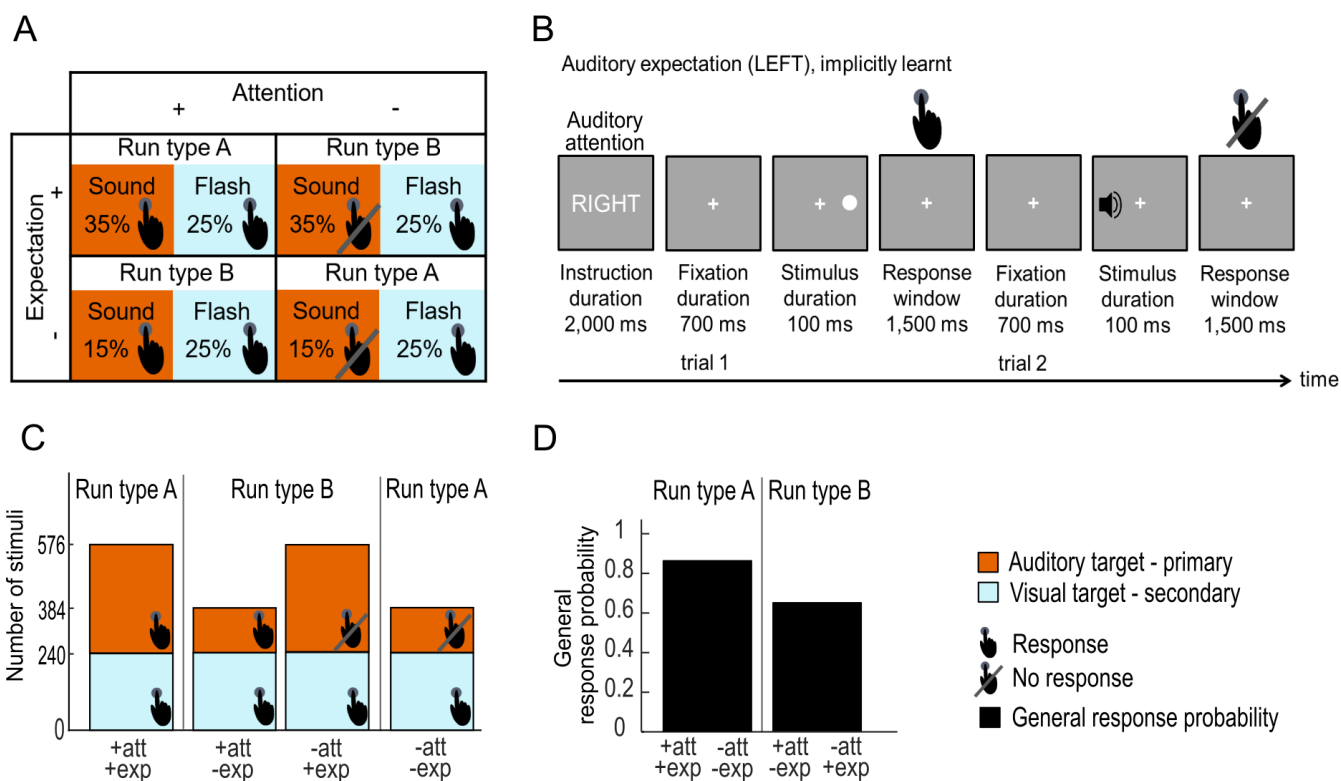

295

296 **Figure 1:** Design and example trials of experiment 1 (audition to vision)

297 **A.** Experiment 1: auditory spatial attention and expectation (i.e., signal probability) were  
 298 manipulated in a 2 (auditory modality – dark orange, vs visual modality – light blue) x 2  
 299 (attended hemifield vs unattended hemifield) x 2 (expected hemifield vs unexpected  
 300 hemifield) factorial design. For illustration purposes, stimulus locations (left/right) were  
 301 collapsed. Presence vs absence of response requirement is indicated by the hand symbol,  
 302 spatial signal probability manipulation is indicated by the %. **B.** Experiment 1: example of  
 303 two trials in a session where auditory stimuli were presented with a probability of 0.7 in the  
 304 left hemifield and 0.3 in the right hemifield. At the beginning of each run (i.e., 80 trials), a  
 305 cue informed participants whether to attend and respond to auditory signals selectively in  
 306 their left or right hemifield throughout the entire run. On each trial participants were  
 307 presented with an auditory or visual stimulus (100 ms duration) either in their left or right  
 308 hemifield. They were instructed to respond to auditory stimuli only in the attended hemifield

309 and to all visual stimuli irrespective of the hemifield as fast and accurately as possible with  
310 their index finger. The response window was limited to 1500 ms. Participants were not  
311 explicitly informed that auditory signals were more likely to appear in one of the two  
312 hemifields. Instead, spatial expectation was implicitly learnt within a session (i.e., day).

313 **C.** Experiment 1: number of auditory (dark orange) and visual (light blue) trials in the 2  
314 (attended vs unattended hemifield) x 2 (expected vs unexpected hemifield) design (pooling  
315 over left/right stimulus location). Presence vs absence of response requirement is indicated by  
316 the hand symbol. The fraction of the area indicated by the ‘Response’ hand symbol pooled  
317 over the two bars of one particular run type (e.g., run type A) represents the response related  
318 expectation (i.e., general response probability: the overall probability that a response is  
319 required on a particular trial); general response probability is greater for run type A (85%),  
320 where attention and expectation are congruent, than for run type B (65%), where attention  
321 and expectation are incongruent, as indicated in **D**.

322 Note. Design and procedure of experiment 2 were comparable to that of experiment 1, with  
323 the only difference that vision was the primary modality and audition was the secondary  
324 modality. In other words, in experiment 2 attention and expectation were manipulated  
325 selectively in vision.

326

327 **Data analysis**

328 **Eye movement: exclusion criteria**

329 We excluded trials where participants did not successfully fixate the central cross based on a  
330 dispersion criterion (i.e., distance of fixation from subject's center of fixation, as defined in  
331 calibration trials,  $> 1.3$  degrees for three subsequent samples; Blignaut, 2009). Our  
332 eyetracking data confirmed that participants successfully maintained fixation in both  
333 experiments with only a small number of trials to be excluded (experiment 1: excluded  
334 auditory response trials  $1.8\% \pm 0.5\%$  [across subjects mean  $\pm$  SEM]; excluded visual  
335 response trials  $1.7\% \pm 0.5\%$  [across subjects mean  $\pm$  SEM]; experiment 2: excluded visual  
336 response trials  $2.7\% \pm 1\%$  [across subjects mean  $\pm$  SEM]; excluded auditory response trials  
337  $2.7\% \pm 0.9\%$  [across subjects mean  $\pm$  SEM]).

338

339 **Response time analysis - separately for experiments 1 and 2**

340 We initially analysed response times separately for primary and secondary modalities and  
341 independently for experiments 1 and 2.

342 The response time (RT) analysis was limited to trials with RT within the 1500 ms response  
343 window and was performed after pooling over stimulus location (left/right).

344 For the primary modality (i.e., experiment 1 = audition, experiment 2 = vision), subject-  
345 specific median RT were entered into a two-sided paired-sample t-test with spatial  
346 expectation (expected vs unexpected stimulus) as factor (observers did not respond to targets  
347 in the primary modality in the 'unattended' hemifield). Moreover, subject-specific False  
348 Alarm rates (FA) for the 'unattended' hemifield were entered into a non-parametric two-sided  
349 Wilcoxon Signed Rank tests with spatial expectation (expected vs unexpected stimulus) as  
350 factor. We used non-parametric tests, because False Alarms rates are bounded between 0 and  
351 1 and therefore not normally distributed. For the secondary modality (i.e., experiment 1 =



352 vision, experiment 2 = audition), subject-specific median response time were entered into a 2  
353 (spatial attention: attended vs unattended stimulus) x 2 (spatial expectation: expected vs  
354 unexpected stimulus) repeated measures analysis of variance (ANOVA).

355 For both experiments 1 and 2, the mean hit rates were very high (> 99% in all conditions,  
356 Table 1), indicating that participants accurately performed the detection task. Because of the  
357 absence of a substantial number of misses, hit rates were not further analyzed.

358

### 359 **Response time analysis - combined for experiments 1 and 2**

360 To compare effects of primary vs secondary modality, we compared the response times in the  
361 attended hemifield (averaged across expected and unexpected hemifields) for auditory and  
362 visual stimuli across the two experiments in a 2 (stimulus modality: audition vs vision) x 2  
363 (manipulation: primary/direct vs secondary/indirect modality) repeated measures ANOVA.

364 Next, we investigated whether the effect of spatial expectation (i.e., expected vs unexpected)  
365 in the attended hemifield (no response was required for stimuli in the primary modalities  
366 presented in the unattended hemifield) depended on i. whether targets were presented in the  
367 primary or secondary modalities (i.e., the extent to which spatial expectations generalize  
368 across the senses) and ii. the multisensory generalization direction, from audition to vision  
369 and from vision to audition (i.e., whether spatial expectations generalize differently  
370 depending on whether audition or vision is the primary modality). Hence, we first computed  
371 the difference in median RT ( $\Delta RT_{Exp}$ ) between unexpected and expected stimuli presented in  
372 the attended hemifield (which corresponds to  $\Delta RT_{Exp}$  between attended stimuli in run type B  
373 and run type A) for targets in each experiment, yielding four conditions: i. auditory targets as  
374 primary modality (experiment 1), ii. visual targets as secondary modality (experiment 1), iii.  
375 visual targets as primary modality (experiment 2), iv. auditory targets as secondary modality  
376 (experiment 2).  $\Delta RT_{Exp}$  were entered into a 2 (multisensory generalization direction: audition

377 to vision vs vision to audition) x 2 (manipulation: primary/direct vs secondary/indirect  
378 modality) repeated measures ANOVA. Please note that the interaction then reflects the  
379 difference between targets in the auditory and visual modality.

380

### 381 **Time course of response times - combined for experiment 1 and 2**

382 Finally, we assessed how these effects of multisensory generalization direction and  
383 direct/indirect manipulation evolved over time. For this, we computed the difference in  
384 median RT ( $\Delta RT_{Exp}$ ) between unexpected and expected stimuli, as in the previous analysis,  
385 but now separately for the first and second half of the experiment (i.e., one half = 430 trials).  
386 Each half contained the data from 6 subsequent attention runs (3 runs of type A and 3 runs of  
387 type B) for each expectation condition.  $\Delta RT_{Exp}$  (or each half) were entered in a 2  
388 (multisensory generalization direction: audition to vision vs vision to audition) x 2  
389 (manipulation: primary/direct vs secondary/indirect modality) x 2 (time: first vs second half  
390 of the experiment) repeated measures ANOVA. Figure 2D shows the across subjects' mean  
391 ( $\pm$ SEM) RT separately for each of the 2 attention runs (1 of type A and 1 of type B) (orange  
392 and blue circles) as a more fine-grained temporal characterization of the effects of  
393 expectation over time. An additional analysis using this more fine-grained temporal division  
394 replicated the results reported in this manuscript where we separated the data into halves.

395

396 For all analyses we assessed the assumptions of normality using the Shapiro–Wilk test  
397 (Shapiro and Wilk, 1965). When normality was violated, we evaluated the main effects of  
398 attention, expectation and their interactions in the factorial design using permutation testing  
399 with  $2^{28}$  permutations (Nichols & Holmes, 2002). Because in these cases permutation tests  
400 replicated the results of the initial ANOVAs, we only report the results of the ANOVAs for  
401 consistency.

402 **Results**

403

404 **Generalization of attention and expectation effects across modalities – separately for**  
405 **experiment 1 and 2**

406 In experiment 1, participants responded to auditory targets presented in their attended  
407 hemifield and to all visual targets. In experiment 2, participants responded to visual targets  
408 presented in their attended hemifield and to all auditory targets.

409 We observed qualitatively similar effects across experiments 1 and 2. Table 1 shows RT  
410 (across participants' mean  $\pm$  SEM) for targets in the auditory and visual modalities for the  
411 two experiments.

412 For the primary modality, the two-sided paired-sample t-tests showed significantly faster RT  
413 in the attended hemifield, when this hemifield was expected than unexpected (experiment 1,  
414 auditory modality:  $t(27) = -2.83$ ,  $p = 0.009$ , Cohen's  $d_{av}$  [95% CI] = -0.16 [-0.27, -0.04];  
415 experiment 2, visual modality:  $t(27) = -9.62$ ,  $p < 0.001$ , Cohen's  $d_{av}$  [95% CI] = -0.35 [-0.47,  
416 -0.23]) (Table 1, Fig. 2A and 2B). Moreover, the Wilcoxon Signed Rank tests showed  
417 significantly greater FA in the unattended hemifield, when stimuli in this hemifield were  
418 unexpected than expected (experiment 1, auditory modality:  $W = 52$ ,  $p = 0.001$ ,  $r$  [95% CI] =  
419 -0.72 [-0.87, -0.45]; experiment 2, visual modality:  $W = 2$ ,  $p < 0.001$ ,  $r$  [95% CI] = -0.99 [-1,  
420 -0.98]) (Table 1).

421 For the secondary modality, the 2 (attended vs unattended) x 2 (expected vs unexpected)  
422 repeated measures ANOVAs revealed a significant main effect of attention (experiment 1,  
423 visual modality:  $F(1, 27) = 72.08$ ,  $p < 0.001$ ,  $\eta_p^2$  [90% CI] = 0.73 [0.55, 0.80]; experiment 2,  
424 auditory modality:  $F(1, 27) = 36.91$ ,  $p < 0.001$ ,  $\eta_p^2$  [90% CI] = 0.58 [0.34, 0.70]). Results  
425 showed that participants responded faster to targets presented in their attended than  
426 unattended hemifields.

427 Moreover, a significant crossover interaction between attention and expectation was observed  
428 (experiment 1, visual modality:  $F(1, 27) = 10.09, p = 0.004, \eta_p^2 [90\% \text{ CI}] = 0.27 [0.06, 0.46]$ ;  
429 experiment 2, auditory modality:  $F(1, 27) = 44.10, p < 0.001, \eta_p^2 [90\% \text{ CI}] = 0.62 [0.40,$   
430  $0.73]$ ) (Table 1, Fig. 2A and 2B). The simple main effects showed that participants responded  
431 significantly faster to targets in their attended hemifield, when this hemifield was expected  
432 than unexpected (experiment 1, visual modality:  $t(27) = -2.81, p = 0.009$ , Cohen's  $d_{av}$  [95%  
433 CI] =  $-0.08 [-0.15, -0.02]$ ; experiment 2, auditory modality:  $t(27) = -5.96, p < 0.001$ , Cohen's  
434  $d_{av}$  [95% CI] =  $-0.14 [-0.19, -0.08]$ ). This significant simple main effect demonstrates that the  
435 effects of spatial attention and expectation generalized from primary to secondary modalities,  
436 where neither attention nor expectation were explicitly manipulated. By contrast, participants  
437 responded significantly more slowly to targets in the secondary modality in the unattended  
438 hemifield, when this hemifield was expected than unexpected (experiment 1, visual modality:  
439  $t(27) = 2.56, p = 0.016$ , Cohen's  $d_{av}$  [95% CI] =  $0.09 [0.02, 0.17]$ ; experiment 2, auditory  
440 modality:  $t(27) = 5.53, p < 0.001$ , Cohen's  $d_{av}$  [95% CI] =  $0.18 [0.10, 0.26]$ ) (Table 1, Fig. 2A  
441 and 2B). We suggest that simple main effects for expectation show opposite directions  
442 because of response inhibition. In the attended hemifield observers need to respond to the  
443 stimuli in the primary modality. Hence, if stimuli from the primary modality are frequent  
444 (i.e., expected) in the attended hemifield, observers need to respond on a large percentage of  
445 trials. By contrast, in the unattended hemifield observers should not respond to the stimuli in  
446 the primary modality. Hence, if stimuli in the primary modality are frequent (i.e., expected)  
447 in the unattended hemifield, observers need to inhibit their response on a large percentage of  
448 trials. This explanation is also supported by the increase in FA for the primary modality in the  
449 unattended hemifield when stimuli in this hemifield are unexpected relative to expected (see  
450 above and Fig. 1D). Collectively, the response times and FA rates suggest that, in runs in  
451 which observers need to respond to many stimuli, because the stimulus frequency is high in

452 the task-relevant/attended hemifield, observers will make more false alarms to stimuli of the  
453 primary modality and respond faster to stimuli of the secondary modality in the unattended  
454 hemifield. We can explain this profile in decision making models in which observers need to  
455 accumulate evidence to a threshold. An increase in the percentage of trials that require a  
456 response may then be reflected either in a shift of the starting point closer to the decisional  
457 boundary or in a lower decisional boundary (Gold & Shadlen, 2001).

458

459

460

461

462

463

464

465

466

467

468

469

470

471

472

473

474

475

476

477 **Table 1:** Group mean hit rates, false alarm (FA) rate and reaction times (RT) and for each  
 478 stimulus modality in each condition where a response was given for experiment 1 (primary  
 479 modality: audition, secondary modality: vision) and experiment 2 (primary modality: vision,  
 480 secondary modality: audition). In experiment 1, participants responded only to attended  
 481 auditory targets (and to all visual targets); in experiment 2 participants responded only to  
 482 attended visual targets (and to all auditory targets). Standard errors (SEM) are given in  
 483 parentheses.

484

|                       | <b>Auditory modality</b> |                 |                 |                 | <b>Visual modality</b> |                 |                 |                 |
|-----------------------|--------------------------|-----------------|-----------------|-----------------|------------------------|-----------------|-----------------|-----------------|
| <b>Experiment 1</b>   | +att<br>+exp             | +att<br>-exp    | -att<br>+exp    | -att<br>-exp    | +att<br>+exp           | +att<br>-exp    | -att<br>+exp    | -att<br>-exp    |
| Hit rate (%)<br>(SEM) | 99.5<br>(0.19)           | 99.5<br>(0.15)  | /               | /               | 99.7<br>(0.07)         | 99.7<br>(0.07)  | 99.3<br>(0.16)  | 99.4<br>(0.13)  |
| FA rate (%)<br>(SEM)  | /                        | /               | 4.4<br>(0.8)    | 7.1<br>(0.1)    | /                      | /               | /               | /               |
| RT (ms)<br>(SEM)      | 599.7<br>(20.1)          | 616.2<br>(19.2) | /               | /               | 514.4<br>(16.9)        | 522.1<br>(16.9) | 583.8<br>(18.5) | 574.4<br>(18.9) |
| <b>Experiment 2</b>   | +att<br>+exp             | +att<br>-exp    | -att<br>+exp    | -att<br>-exp    | +att<br>+exp           | +att<br>-exp    | -att<br>+exp    | -att<br>-exp    |
| Hit rate (%)<br>(SEM) | 99.8<br>(0.08)           | 99.9<br>(0.03)  | 99.2<br>(0.22)  | 99.4<br>(0.18)  | 99.7<br>(0.09)         | 99.7<br>(0.09)  | /               | /               |
| FA rate (%)<br>(SEM)  | /                        | /               | /               | /               | /                      | /               | 3.2<br>(0.5)    | 8<br>(1)        |
| RT (ms)<br>(SEM)      | 527.4<br>(20.2)          | 542.1<br>(20)   | 605.2<br>(25.7) | 581.3<br>(24.2) | 526.3<br>(17.9)        | 561.8<br>(19.9) | /               | /               |

485

486

487

## 488 **The effects of primary vs secondary modality – combined for experiment 1 and 2**

489 To assess the effect of primary vs secondary modality unconfounded by differences between  
490 auditory vs visual modality, we directly compared the response times in the attended  
491 hemifield (averaged across expected and unexpected hemifields) for auditory and visual  
492 stimuli across the two experiments. The 2 (stimulus modality: audition vs vision) x 2  
493 (manipulation: primary/direct vs secondary/indirect modality) repeated measures ANOVA  
494 revealed a significant main effect of stimulus modality ( $F(1, 27) = 40.14, p < 0.001, \eta_p^2$  [90%  
495 CI] = 0.60 [0.37, 0.72]), showing faster RT for visual than auditory targets; of manipulation  
496 ( $F(1, 27) = 151.80, p < 0.001, \eta_p^2$  [90% CI] = 0.85 [0.74, 0.89]), showing overall faster RT  
497 for secondary than primary modality. Moreover, we observed a significant interaction  
498 between stimulus modality and manipulation ( $F(1, 27) = 6.79, p = 0.015, \eta_p^2$  [90% CI] = 0.20  
499 [0.02, 0.39]), showing that observers were significantly faster responding to stimuli in the  
500 secondary than primary sensory modality predominantly in experiment 1 (primary = auditory,  
501 secondary = visual,  $t(27) = 11.67, p < 0.001$ , Cohen's  $d_{av}$  [95% CI] = 0.93 [0.63, 1.22]).  
502 Collectively, these results suggest that observers responded faster to stimuli in their  
503 secondary modality than in their primary modality. As expected, this effect was more  
504 sensitively revealed for auditory stimuli that were associated with slower response times.  
505 These effects can be explained by the fact that observers needed to respond to all stimuli in  
506 the secondary modality irrespective of hemifield. By contrast, they first needed to  
507 discriminate whether signals were presented in the left or right hemifield when responding to  
508 stimuli in the primary sensory modality. Because the spatial reliability is lower for auditory  
509 than visual signals in our study, these effects were more prominent for auditory stimuli.

510

511

512

## 513 **The effects of spatial expectation – combined for experiment 1 and 2**

514 In the previous analysis we showed that the effects of expectation on response times  
515 generalized from the primary to the secondary modality. Next, we directly compared the  
516 effects of spatial expectation across the two experiments, in which either audition was the  
517 primary and vision the secondary modality or vice versa. The 2 (multisensory generalization  
518 direction: audition to vision vs vision to audition) x 2 (manipulation: primary/direct vs  
519 secondary/indirect modality) repeated measures ANOVA revealed a significant main effect  
520 of manipulation ( $F(1, 27) = 18.03, p < .001, \eta_p^2 [90\% \text{ CI}] = 0.40 [0.16, 0.56]$ ), showing  
521 overall greater expectation effects for primary than secondary modalities (dark vs light bars  
522 in Fig. 2C). Moreover, we observed a significant main effect of crossmodal generalization  
523 direction ( $F(1, 27) = 20.71, p < .001, \eta_p^2 [90\% \text{ CI}] = 0.43, [0.19, 0.59]$ ), with a greater  
524 expectation effect (i.e., greater  $\Delta RT_{\text{Exp}}$ ) for vision to audition than for audition to vision  
525 (experiment 2 vs experiment 1 in Fig. 2C). Critically, this generalization effect may be  
526 greater from vision to audition than vice versa because observers learn signal probabilities  
527 and hence form spatial expectations faster when vision is the primary modality (dark blue bar  
528 in Fig. 2C). Alternatively, the expectation effect generalizes more effectively from vision to  
529 audition than vice versa (light orange bar in Fig. 2C).

530

## 531 **Time course of the effects of spatial expectation - combined for experiment 1 and 2**

532 To disentangle between these two possibilities, we investigated how signal probability is  
533 learnt over time when audition (experiment 1) or vision (experiment 2) are the primary  
534 modality by repeating the previous analysis with the additional factor of time (i.e., first vs  
535 second half of experiment). The 2 (multisensory generalization direction: audition to vision  
536 vs vision to audition) x 2 (manipulation: primary/direct vs secondary/indirect modality) x 2  
537 (time: first vs second half of the experiment) repeated measures ANOVA performed on



538  $\Delta RT_{Exp}$  revealed significant main effects of multisensory generalization direction ( $F(1, 27) =$   
539  $22.70, p < 0.001, \eta_p^2$  [90% CI] = 0.46 [0.21, 0.61]), manipulation ( $F(1, 27) = 13.77, p <$   
540  $0.001, \eta_p^2$  [90% CI] = 0.34 [0.10, 0.51]) as well as a significant interaction between  
541 multisensory generalization direction x manipulation x time ( $F(1, 27) = 11.38, p = 0.002, \eta_p^2$   
542 [90% CI] = 0.29 [0.07, 0.48]).

543

544 We unpacked the 3-way ANOVA into two 2-ways ANOVAs for further analysis, one for  
545 each half of the experiment, with factors multisensory generalization direction (audition to  
546 vision vs vision to audition) and manipulation (primary/direct vs secondary/indirect  
547 modality).

548 For the first half of the experiment, our results revealed a significant main effect of  
549 multisensory generalization direction ( $F(1, 27) = 8.34, p = 0.008, \eta_p^2$  [90% CI] = 0.24 [0.04,  
550 0.42]), manipulation ( $F(1, 27) = 28.84, p < 0.001, \eta_p^2$  [90% CI] = 0.52 [0.27, 0.65]) and a  
551 significant interaction between multisensory generalization direction and manipulation ( $F(1,$   
552  $27) = 12.83, p = 0.001, \eta_p^2$  [90% CI] = 0.32 [0.09, 0.50]) (left bar plot in Fig. 2D). Post-hoc  
553 comparisons indicated that  $\Delta RT_{Exp}$  in the primary modality of experiment 2 (i.e., vision) were  
554 significantly greater than  $\Delta RT_{Exp}$  in the primary modality of experiment 1 (i.e., audition)  
555 ( $t(27) = 5.72, p < 0.001$ , Cohen's  $d_{av}$  [95% CI] = 1.05, [0.59, 1.50], dark blue vs dark orange  
556 bars in the left bar plot of Fig. 2D), and greater than the effects of expectation in the  
557 secondary modality of experiment 2 (i.e., audition) ( $t(27) = 4.97, p < 0.001$ , Cohen's  $d_{av}$   
558 [95% CI] = 1.03, [0.53, 1.51], dark blue vs light orange bars in the left bar plot of Fig. 2D).  
559 Moreover, the effects of expectation in the secondary modality of experiment 2 (i.e.,  
560 audition) were significantly greater than those in the secondary modality of experiment 1  
561 (i.e., vision) ( $t(27) = 2.14, p = 0.042$ , Cohen's  $d_{av}$  [95% CI] = 0.48, [0.02, 0.94], light orange  
562 vs light blue bars in the left bar plot of Fig. 2D).

563 For the second half of the experiment, our results only revealed a significant main effect of  
564 manipulation ( $F(1, 27) = 11.41, p = 0.002, \eta_p^2 [90\% \text{ CI}] = 0.30 [0.07, 0.48]$ ) (right bar plot in  
565 Fig. 2D) but no significant main effect of multisensory generalization direction or significant  
566 interaction between multisensory generalization direction and manipulation was found.

567

568 To summarize, these results show that: (1) an effect of generalization direction (i.e., audition  
569 to vision vs vision to audition) was found only for the first half of the experiment. Here, the  
570 effects of expectation generalized crossmodally in an attenuated fashion only from vision to  
571 audition in experiment 2 (i.e., primary modality: vision) but no difference between audition  
572 and vision was found in experiment 1 (i.e., primary modality: audition). By contrast, in the  
573 second half of the experiment we did not observe an effect of multisensory generalization  
574 direction. Instead, the effects of expectation generalized from the primary to the secondary  
575 modality in an attenuated fashion similarly when vision or audition were the primary  
576 modality. As shown in figure 2D, this difference between first and second halves can be  
577 explained by the fact that observers form spatial expectations (i.e., learn signal probability  
578 over space) more slowly in audition than vision. Yet, once expectations are learnt in audition,  
579 the crossmodal generalization is comparable for audition and vision. In other words, the  
580 effect of generalization direction that we observed in our analysis that did not yet account for  
581 learning effects (i.e., our second analysis) can be explained away by the speed with which  
582 observers learn signal probabilities and form spatial expectations in their primary modality.  
583 In other words, signal probabilities are learnt faster in vision than audition, but once spatial  
584 expectations are formed, they generalize similarly from vision to audition and vice versa.

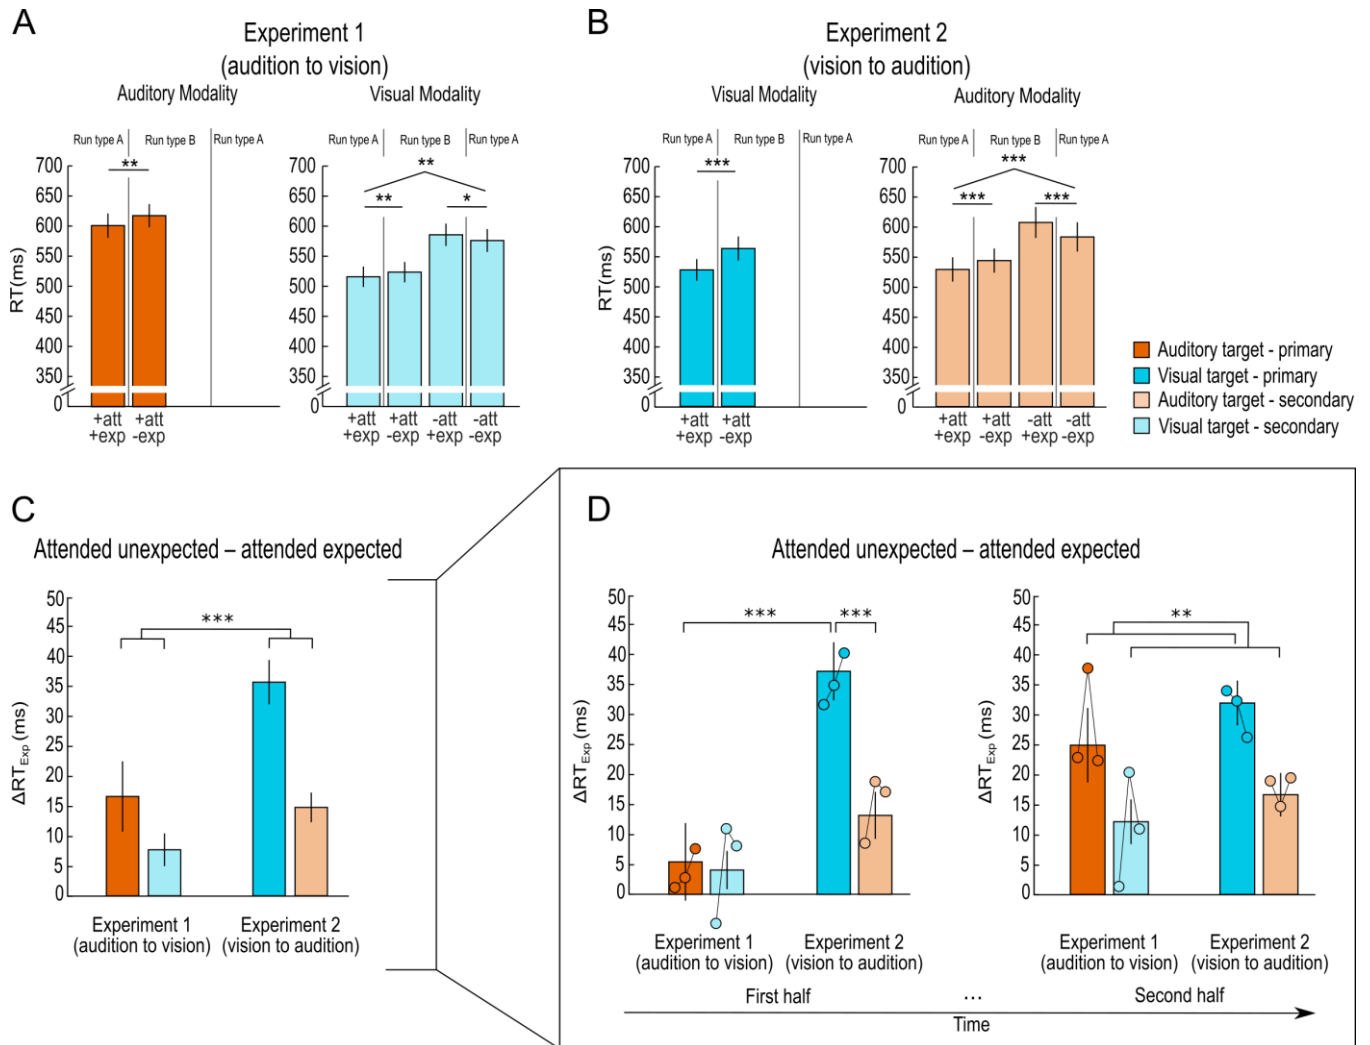

585

586 **Figure 2:** Behavioural results of experiment 1 and 2.

587 Bar plots represent across subjects' mean ( $\pm$ SEM) RT for each of the six conditions with  
 588 response requirements for experiment 1 (primary modality: audition; secondary modality:  
 589 vision, **A**) and 2 (primary modality: vision; secondary modality: audition, **B**), pooling over  
 590 left/right stimulus location. Overall slower RT are observed for runs type B than runs type A,  
 591 which reflects differences in general response probability (see Fig. 1D) **C.** Bar plots represent  
 592 across subjects' mean ( $\pm$ SEM)  $\Delta$ RT for effects of spatial expectation (attended unexpected –  
 593 attended expected hemifield) in the primary (dark bars) and secondary modalities (light bars)  
 594 for experiment 1 and 2. **D.** Effects of response probability (attended unexpected – attended

595 expected hemifield) over time (i.e., first and second half: bars; consecutive sets of 2 attention  
596 runs: circles) for audition and vision as primary (dark bars) or secondary (light bars)  
597 modality. Brackets and stars indicate significance of main effects and interactions.  $*p < 0.05$ ;  
598  $**p < 0.01$ ;  $***p < 0.001$ . Audition: orange; vision: blue.

599

## 600 **Discussion**

601 The current study investigated how observers allocate attention and form expectations (by  
602 learning signal probabilities) over space across audition and vision. We orthogonally  
603 manipulated spatial attention as response requirement and expectation as stimulus probability  
604 over space selectively in the primary modality and assessed their effects on behavioral  
605 responses to targets presented in the primary and secondary modalities. Across two  
606 experiments we alternated the assignment of vision and audition to primary or secondary  
607 modality. This allowed us to compare behavioral effects of spatial attention and expectation  
608 in audition and vision and their crossmodal generalization.

609 Regardless of sensory modality we observed a significant main effect of spatial attention for  
610 targets in the secondary modality, in which attention was not directly manipulated. Auditory  
611 spatial attention partially generalized to the visual modality and vice versa. These findings  
612 converge with a large body of behavioral and neuroimaging work suggesting that attentional  
613 resources are allocated interactively across the senses (Spence & Driver, 1996; Eimer &  
614 Schröger, 1998; Eimer, 1999; Macaluso et al., 2002; Santangelo et al., 2009; Zuanazzi &  
615 Noppeney, 2019).

616 Likewise, in the attended hemifield observers were faster at target detection in the primary  
617 and secondary modalities when the hemifield was expected than unexpected (i.e., high > low  
618 signal probability). Again, this response facilitation for expected (relative to unexpected)  
619 spatial locations were observed irrespective of whether vision or audition served as primary

620 modality. Yet, in the unattended hemifield, in which we could assess effects of expectation  
621 only for the secondary modality, we observed the opposite pattern, i.e., observers were slower  
622 at target detection for expected than unexpected hemifields. Combining these two results, we  
623 observed a significant interaction between spatial attention and expectation, for both vision  
624 and audition as secondary modalities. In a previous study (Zuanazzi & Noppeney, 2018) we  
625 argued that this interaction profile between spatial attention and expectation is explained by  
626 attention and expectation jointly co-determining general response probability (i.e., the  
627 probability to respond regardless of the hemifield in which the signal is presented). More  
628 specifically, in runs in which attention and expectation are directed to the same hemifield  
629 (runs of type A, Fig. 1A, 1C and 1D), participants have to respond to 85% of trials of the  
630 entire run, but only to 65% trials in runs of type B in which attention and expectation are  
631 directed to different hemifields (i.e., general response probability, Fig. 1A, 1C and 1D).  
632 Hence, faster response times may result from an increase in alertness, arousal or motor  
633 preparation that is needed to respond on a large proportion of trials (i.e., attended/expected  
634 and unattended/unexpected conditions, run type A, Fig. 2A and 2B) (Mars et al., 2007;  
635 Bestmann et al., 2008). By contrast, in runs in which attention and expectation are directed to  
636 different hemifields (runs of type B, Fig. 1A, 1C and 1D), observers need to inhibit their  
637 response to the frequent stimuli of the primary modality in the expected hemifield and hence  
638 respond more slowly to targets in the secondary modality.

639 Critically, response probability does not depend on whether the signal is auditory or visual,  
640 but it is calculated as the probability that any signal is responded to. If the expectation effects  
641 result purely from amodal mechanisms (e.g., general alertness, arousal, motor preparation  
642 etc.) associated with changes in response probability, the expectation effects in the attended  
643 hemifield should be equal for primary and secondary modalities. By contrast, if expectations  
644 (i.e., auditory or visual signal probability) are formed at least partially in a modality-specific

645 fashion, we should observe expectation effects (i.e.,  $\Delta RT_{Exp}$ ) that are greater for the primary  
646 modality (where expectation was explicitly manipulated) than for the secondary modality  
647 (i.e., an attenuated crossmodal generalization).

648 To arbitrate between these two hypotheses, we analyzed  $\Delta RT_{Exp}$  in a 2 (multisensory  
649 generalization direction) x 2 (manipulation) repeated measures ANOVA. This analysis  
650 revealed a significant main effect of ‘manipulation’, i.e., whether the stimulus was presented  
651 in the primary modality (in which expectation was explicitly manipulated) or in the  
652 secondary modality. Consistent with additional modality-specific mechanisms of expectation,  
653 observers showed a greater expectation effect for targets in the primary than the secondary  
654 modality. These results strongly suggest that implicitly learned spatial expectations modulate  
655 perceptual decision making via both modality-specific and amodal response mechanisms.

656 This duality of modality-specific and amodal mechanisms converge with recent  
657 neuroimaging findings which showed effects of expectation selective for auditory stimuli as  
658 primary modality in auditory cortices and higher-order frontoparietal systems (Zuanazzi &  
659 Noppeney, 2019). Potentially, the activation increases in auditory cortices may reflect  
660 prediction error signals based on modality-specific expectations (Friston, 2005), while higher  
661 frontoparietal systems may be associated with additional response-related processes.

662 Surprisingly, the repeated measures ANOVA also revealed a main effect of multisensory  
663 generalization direction with greater effects in experiment 2 (i.e., vision to audition) than  
664 experiment 1 (i.e., audition to vision). Our time course analysis showed that this difference  
665 between experiments does not reflect genuine differences in the effectiveness with which  
666 spatial expectations are implicitly learnt and generalize from audition to vision and vice  
667 versa, but reflects differences in the speed with which spatial expectations are learnt in  
668 audition and vision. In the second half of the experiment in which the expectation effect in the  
669 primary modality is comparable between auditory (experiment 1) and visual (experiment 2)

670 targets, we no longer observe a significant effect of multisensory generalization direction. In  
671 other words, observers are slower at learning spatial expectations (i.e., signal probability) in  
672 audition than in vision. But, once they have formed spatial expectations of comparable  
673 precision for audition and vision, they also generalize similarly from audition to vision and  
674 vice versa.

675 The difference in perceptual learning rates between vision and audition may result from how  
676 the brain forms spatial representations in vision and audition (Neumann et al., 1986). While  
677 visual cortices are retinotopically organized and hence directly represent spatial location in a  
678 place code (i.e., based on space, Sereno et al., 1995; Maier & Groh, 2009), primary auditory  
679 cortices are tonotopically organized (i.e., based on frequency, Lauter et al., 1985,  
680 Middlebrooks &, 1991; Maier & Groh, 2009). In audition, spatial locations are computed  
681 only indirectly from binaural amplitude and latency differences and from monaural filtering  
682 cues. Moreover, visual objects tend to be more permanent across time, whereas source sounds  
683 are often transient and dynamic (Neisser, 1976; Neumann et al., 1986). Most importantly, in  
684 everyday life vision provides typically (i.e., under optimal lighting conditions) more reliable  
685 spatial information than audition (Dacey et al., 1992; Knudsen & Brainard, 1995; Stephen et  
686 al., 2002; Talsma et al., 2008; Mengotti et al., 2018; see also Molholm et al., 2007). In the  
687 current study, the high spatial reliability of the visual stimulus (i.e., a white disc) may also  
688 have contributed to the shorter time for participants to learn spatial signal probabilities and  
689 thus become aware of their manipulation in vision. Critically, participants' awareness of such  
690 manipulation is evidenced by our questionnaires' results. Alternatively, even in absence of  
691 explicit awareness, the distribution of events or targets across space could have been learnt  
692 faster for more reliable visual than auditory signals (Miller & Pachella, 1973; Jabar &  
693 Anderson, 2015). Conversely, in a paradigm that investigates temporal attention/expectation  
694 mechanisms, the high temporal resolution and precision of auditory signals (Shimojo &

695 Shams, 2001) could facilitate learning of temporal probability in audition more than in vision  
696 and crossmodal effects could change accordingly. The existence of cross-modal effects of  
697 temporal attention is shown in previous studies investigating how attention is oriented to  
698 different points in time (e.g., Lange & Röder, 2006). However, while the effects of spatial  
699 and temporal attention were similar for auditory processing, they differed for visual and  
700 tactile modalities, suggesting the existence of modality specific mechanisms also in the  
701 temporal domain. To better understand the fine-grained temporal aspects of spatial  
702 expectation or signal probability learning across sensory modalities, future studies will need  
703 to characterize the time course of spatial learning across sensory systems.

704 So far, we have discussed that spatial expectations generalize only partially across the senses.  
705 One critical question is whether this partial generalization is generic or arises because the  
706 decisions rely on different processes in our paradigm. Most importantly, as we have indicated  
707 in the Results section, observers had to respond to stimuli in the primary modality only in one  
708 hemifield, but in the secondary modality in both hemifields. This experimental choice  
709 enabled us to assess the additive and interactive effects of spatial attention and expectation in  
710 both hemifields for the secondary modality. As a consequence, however, observers needed to  
711 determine the hemifield in which the stimulus occurred before making a response only for the  
712 primary modality. By contrast, they could respond non-discriminatively to all stimuli in the  
713 secondary modality. This difference in the decision-making process most likely explains that  
714 observers were faster to respond to sounds when audition was the secondary than the primary  
715 sensory modality. An outstanding question is whether this difference in the decision-making  
716 process can also explain the partial generalization of the expectation effects. In other words,  
717 would we observe more extensive or perhaps complete generalization across sensory  
718 modalities if both primary and secondary modalities rely on similar decision-making  
719 processes? Or even more fundamentally, can the differences in magnitude in the expectation



720 effects for primary and secondary modality be explained by the fact that expectations  
721 influence spatial discrimination processes that are required only for responding to stimuli in  
722 the primary modality? To address this question, future studies may manipulate attention and  
723 expectation in both sensory modalities. For instance, they may present observers with  
724 auditory and visual stimuli in left and right hemifields. Auditory stimuli may occur mainly in  
725 the left and visual in the right hemifield. Importantly, observers will need to respond to  
726 auditory and visual stimuli only when they occur in one particular (e.g., left) hemifield, so  
727 that responses to both auditory and visual stimuli will require spatial discrimination between  
728 hemifields. However, as we have argued in a previous study, manipulating response  
729 requirement and spatial expectations orthogonally across sensory modalities may interact at  
730 the several levels by jointly specifying not only observers' general response probability but  
731 also spatially selective response probabilities (Zuanazzi & Noppeney, 2018). Further, it is  
732 important to emphasize that these manipulations of spatial signal probability and response  
733 requirement over space operate bidirectionally from audition to vision and vice versa as well  
734 as from primary to secondary modality and vice versa, thus interpretational ambiguities may  
735 remain. Alternatively, complementary insights may be gained from neuroimaging research  
736 that can implicitly assess the multisensory generalization of neural representations linked  
737 with spatial expectations even when no response is required.

738 In summary, our results suggest that the brain allocates spatial attention and forms spatial  
739 expectation to some extent interactively across audition and vision (Eimer & Schröger, 1998;  
740 Eimer, 1999; Macaluso, 2010). With respect to spatial attention, our results corroborate  
741 previous research. With respect to spatial expectation, we show that they rely on modality-  
742 specific and amodal mechanisms. In support of modality-specific mechanisms we  
743 demonstrate that spatial expectations in the attended hemifield generalize from the primary to  
744 the secondary modality only in an attenuated fashion. In support of amodal response-related

745 mechanisms, we demonstrate that, for both primary and secondary modalities, response times  
746 are closely related to the general response probability and associated processes of arousal,  
747 alertness and motor preparation. Critically, our learning analysis suggests that observers learn  
748 spatial probabilities more slowly in audition than vision, which may be related to their  
749 different spatial reliabilities. Once observers have formed comparable spatial expectations in  
750 audition, these generalize equally effectively from audition to vision as from vision to  
751 audition. In other words, our results demonstrate crossmodal interactions of perceptual  
752 learning (i.e., expectations building) in spatial perception but also show differences between  
753 sensory modalities in terms of the speed with which signal probabilities over space are learnt.

754

#### 755 **Declaration of Conflicting Interests**

756 The authors declared that they had no conflicts of interest with respect to their authorship or  
757 the publication of this article.

758

#### 759 **Funding**

760 This research was funded by ERC-2012-StG\_20111109 multisens

761

#### 762 **Acknowledgments**

763 We thank Catarina S. Ferreira and Remi Gau for their helpful comments on this manuscript.

764

765

766

767

768

769

770 **References**

- 771 Aller, M., Giani, A., Conrad, V., Watanabe, M., & Noppeney, U. (2015). A spatially  
772 collocated sound thrusts a flash into awareness. *Frontiers in Integrative Neuroscience*,  
773 9(February), 1–8.
- 774 Aller, M., & Noppeney, U. (2019). To integrate or not to integrate: Temporal dynamics of  
775 hierarchical Bayesian causal inference. *PLoS biology* (Vol. 17).
- 776 Batson, M. A., Watanabe, T., Seitz, A. R., & Beer, A. L. (2011). Spatial shifts of audio-visual  
777 interactions by perceptual learning are specific to the trained orientation and eye. *Seeing and*  
778 *Perceiving*, 24(6), 579–594.
- 779 Bestmann, S., Harrison, L. M., Blankenburg, F., Mars, R. B., Haggard, P., Friston, K. J., &  
780 Rothwell, J. C. (2008). Influence of uncertainty and surprise on human corticospinal  
781 excitability during preparation for action. *Current Biology*, 18(10), 775–780.
- 782 Blignaut, P. (2009). Fixation identification: the optimum threshold for a dispersion algorithm.  
783 *Attention, Perception & Psychophysics*, 71(4), 881–895.
- 784 Bratzke, D., Seifried, T., & Ulrich, R. (2012). Perceptual learning in temporal discrimination:  
785 Asymmetric cross-modal transfer from audition to vision. *Experimental Brain Research*,  
786 221(2), 205–210.
- 787 Bressler, S. L., Tang, W., Sylvester, C. M., Shulman, G. L., & Corbetta, M. (2008). Top-  
788 down control of human visual cortex by frontal and parietal cortex in anticipatory visual  
789 spatial attention. *The Journal of Neuroscience*, 28, 10056–10061.
- 790 Bueti, D., & Buonomano, D. V. (2014). Temporal perceptual learning. *Timing and Time*  
791 *Perception*, 2(3), 261–289.
- 792 Bueti, D., Lasaponara, S., Cercignani, M., & Macaluso, E. (2012). Learning about time:  
793 Plastic changes and interindividual brain differences. *Neuron*, 75(4), 725–737.

- 794 Carrasco, M. (2011). Visual attention: The past 25 years. *Vision Research*, 51(13), 1484–  
795 1525.
- 796 Crist, R. E., Kapadia, M. K., Westheimer, G., & Gilbert, C. D. (1997). Perceptual learning of  
797 spatial localization: Specificity for orientation, position, and context. *Journal of*  
798 *Neurophysiology*, 78(6), 2889–2894.
- 799 Dacey, D. M., & Petersen, M. R. (1992). Dendritic field size and morphology of midget and  
800 parasol ganglion cells of the human retina. *Proceedings of the National Academy of Sciences*  
801 *of the United States of America*, 89(20), 9666–9670.
- 802 Doricchi, F., Macci, E., Silvetti, M., & Macaluso, E. (2010). Neural correlates of the spatial  
803 and expectancy components of endogenous and stimulus-driven orienting of attention in the  
804 Posner task. *Cerebral Cortex*, 20(7), 1574–1585.
- 805 Driver, J., & Spence, C. (1998). Attention and the crossmodal construction of space. *Trends*  
806 *in Cognitive Sciences*, 2(7), 254–262.
- 807 Eimer, M. (1999). Can attention be directed to opposite locations in different modalities? An  
808 ERP study. *Clinical Neurophysiology*, 110(7), 1252–1259.
- 809 Eimer, M., & Driver, J. (2001). Crossmodal links in endogenous and exogenous spatial  
810 attention: evidence from event-related brain potential studies. *Neuroscience and*  
811 *Biobehavioral Reviews*, 25(6), 497–511.
- 812 Eimer, M., & Schroger, E. (1998). ERP effects of intermodal attention and cross-modal links  
813 in spatial attention. *Psychophysiology*, 35(3), 313–27.
- 814 Feldman, H., & Friston, K. J. (2010). Attention, uncertainty, and free-energy. *Frontiers in*  
815 *Human Neuroscience*, 4(December), 1–23.
- 816 Faul, F., Erdfelder, E., Buchner, A., & Lang, A.-G. (2009). Statistical power analyses using  
817 G\*Power 3.1: tests for correlation and regression analyses. *Behavior Research Methods*,  
818 41(4), 1149–60.

- 819 Friston, K. (2005). A theory of cortical responses. *Philosophical Transactions of the Royal*  
820 *Society of London. Series B, Biological Sciences*, 360(1456), 815–836.
- 821 Gold, J. I., & Shadlen, M. N. (2001). Neural computations that underlie decisions about  
822 sensory stimuli. *Trends in Cognitive Sciences*, 5(1), 10–16.
- 823 Greene, A. J., Easton, R. D., & LaShell, L. S. R. (2001). Visual-auditory events: Cross-modal  
824 perceptual priming and recognition memory. *Consciousness and Cognition*, 10(3), 425–435.
- 825 Jabar, S. B., & Anderson, B. (2015). Probability shapes perceptual precision: A study in  
826 orientation estimation. *Journal of Experimental Psychology: Human Perception and*  
827 *Performance*, 41(6), 1666–1679.
- 828 Jones, S. A., Beierholm, U., Meijer, D., & Noppeney, U. (2019). Older adults sacrifice  
829 response speed to preserve multisensory integration performance. *Neurobiology of Aging*, 84,  
830 148–157.
- 831 Kim, R. S., Seitz, A. R., & Shams, L. (2008). Benefits of stimulus congruency for  
832 multisensory facilitation of visual learning. *PLoS ONE*, 3(1).
- 833 Kincade, J. M., Abrams, R. A., Astafiev, S. V., Shulman, G. L., & Corbetta, M. (2005). An  
834 event-related functional magnetic resonance imaging study of voluntary and stimulus-driven  
835 orienting of attention. *The Journal of Neuroscience*, 25(18), 4593–4604.
- 836 Kleiner, M., Brainard, D., Pelli, D., Ingling, A., Murray, R., & Broussard, C. (2007). What's  
837 new in psychtoolbox-3. *Perception*, 36(14), 1-16.
- 838 Knudsen, E., & Brainard, M. S. (1995). Creating a unified representation of visual and  
839 auditory space in the brain. *Annual Review of Neuroscience*, 18(1), 19–43.
- 840 Lapid, E., Ulrich, R., & Rammsayer, T. (2009). Perceptual learning in auditory temporal  
841 discrimination: No evidence for a cross-modal transfer to the visual modality. *Psychonomic*  
842 *Bulletin and Review*, 16(2), 382–389.

- 843 Lauter, J. L., Herscovitch, P., Formby, C., & Raichle, M. E. (1985). Tonotopic organization  
844 in human auditory cortex revealed by positron emission tomography. *Hearing Res*, 20, 199–  
845 205.
- 846 Macaluso, E., Frith, C. D., & Driver, J. (2002). Supramodal effects of covert spatial orienting  
847 triggered by visual or tactile events. *Journal of Cognitive Neuroscience*, 14(3), 389–401.
- 848 Macaluso, E. (2010). Orienting of spatial attention and the interplay between the senses.  
849 *Cortex*, 46(3), 282–297.
- 850 Lange, K., & Röder, B. (2006). Orienting attention to points in time improves stimulus  
851 processing both within and across modalities. *Journal of Cognitive Neuroscience*, 18(5), 715–  
852 729.
- 853 Macaluso, E., & Doricchi, F. (2013). Attention and predictions: control of spatial attention  
854 beyond the endogenous-exogenous dichotomy. *Frontiers in Human Neuroscience*,  
855 7(October), 685.
- 856 Meegan, D. V, & Aslin, R. N. (2000). Motor timing learned. *Nature Neuroscience*, 3(9).
- 857 Maier, J. X., & Groh, J. M. (2009). Multisensory guidance of orienting behavior. *Hearing*  
858 *Research*, 258(1–2), 106–112.
- 859 Mars, R. B., Bestmann, S., Rothwell, J. C., & Haggard, P. (2007). Effects of motor  
860 preparation and spatial attention on corticospinal excitability in a delayed-response paradigm.  
861 *Experimental Brain Research*, 182(1), 125–129.
- 862 Meijer, D., Veselič, S., Calafiore, C., & Noppeney, U. (2019). Integration of audiovisual  
863 spatial signals is not consistent with maximum likelihood estimation. *Cortex*.
- 864 Middlebrooks, J. C., & Green, D. M. (1991). Sound localization by human listeners. *Annu.*  
865 *Rev. Psychol.*, (42), 135–159.

- 866 Mengotti, P., Boers, F., Dombert, P. L., Fink, G. R., & Vossel, S. (2018). Integrating  
867 modality-specific expectancies for the deployment of spatial attention. *Scientific Reports*,  
868 8(1), 1210.
- 869 Miller, J. O., & Pachella, R. G. (1973). Locus of the stimulus probability effect. *Journal of*  
870 *Experimental Psychology*, 101(2), 227–231.
- 871 Molholm, S., Martinez, A., Shpaner, M., & Foxe, J. J. (2007). Object-based attention is  
872 multisensory: Co-activation of an object's representations in ignored sensory modalities.  
873 *European Journal of Neuroscience*, 26(2), 499–509.
- 874 Mondor, T. A., & Amirault, K. J. (1998). Effect of same- and different-modality spatial cues  
875 on auditory and visual target identification. *Journal of Experimental Psychology*, 24(3), 745–  
876 755.
- 877 Nagarajan, S. S., Blake, D. T., Wright, B. A., Byl, N., & Merzenich, M. M. (1998). Practice-  
878 related improvements in somatosensory interval discrimination are temporally specific but  
879 generalize across skin location, hemisphere, and modality. *Journal of Neuroscience*, 18(4),  
880 1559–1570.
- 881 Neisser, U. (1977). Cognition and reality. *The American Journal of Psychology*, 90(3), 541–  
882 543.
- 883 Neumann, O., Van der Heijden, A. H., & Allport, D. A. (1986). Visual selective attention:  
884 Introductory remarks. *Psychological Research*, 48(4), 185–188.
- 885 Nichols, T.E. & Holmes, A.P. (2002) Nonparametric permutation tests for functional  
886 neuroimaging: a primer with examples. *Hum. Brain Mapp.*, 15, 1-25.
- 887 Odegaard, B., Wozny, D. R., & Shams, L. (2015). Biases in visual, auditory, and audiovisual  
888 perception of space. *PLoS Computational Biology*, 11(12), 1–23.
- 889 Posner, M. I. (1980). Orienting of attention. *Q J Exp Psychol*, 32(1), 3–25.

- 890 Rohe, T., & Noppeney, U. (2015a). Cortical hierarchies perform Bayesian Causal Inference  
891 in multisensory perception. *PLOS Biology*, 13(2), e1002073.
- 892 Rohe, T., & Noppeney, U. (2015b). Sensory reliability shapes perceptual inference via two  
893 mechanisms. *Journal of Vision*, 15, 1–38.
- 894 Rohe, T., & Noppeney, U. (2016). Distinct computational principles govern multisensory  
895 integration in primary sensory and association cortices. *Current Biology*, 26(4), 509–514.
- 896 Rohe, T., & Noppeney, U. (2018). Reliability-weighted integration of audiovisual signals can  
897 be modulated by top-down control. *Eneuro*, 5, 1–20.
- 898 Rohenkohl, G., Gould, I. C., Pessoa, J., & Nobre, A. C. (2014). Combining spatial and  
899 temporal expectations to improve visual perception. *Journal of Vision*, 14(4), 1–13.
- 900 Santangelo, V., Olivetti Belardinelli, M., Spence, C., & Macaluso, E. (2009). Interaction  
901 between voluntary and stimulus-driven spatial attention mechanism across sensory  
902 modalities. *Journal of Cognitive Neuroscience*, 21(12), 2384–2397.
- 903 Sereno, M. I., Dale, a M., Reppas, J. B., Kwong, K. K., Belliveau, J. W., Brady, T. J., ...  
904 Tootell, R. B. H. (1995). Borders of multiple visual areas in humans revealed by functional  
905 magnetic resonance imaging borders of multiple visual areas in humans revealed by  
906 functional magnetic resonance imaging. *Science*, 268(May), 889–893.
- 907 Shimojo, S., & Shams, L. (2001). Sensory modalities are not separate modalities: Plasticity  
908 and interactions. *Current Opinion in Neurobiology*, 11(4), 505–509.
- 909 Spence, C., & Driver, J. (1996). Audiovisual links in endogenous covert spatial attention.  
910 *Journal of Experimental Psychology: Human Perception and Performance*, 22(4), 1005–  
911 1030.
- 912 Spence, C., & Driver, J. (1997). Audiovisual links in exogenous covert spatial orienting.  
913 *Perception & Psychophysics*, 59(1), 1–22.



- 914 Stephen, J. M., Aine, C. J., Christner, R. F., Ranken, D., Huang, M., & Best, E. (2002).  
915 Central versus peripheral visual field stimulation results in timing differences in dorsal stream  
916 sources as measured with MEG. *Vision Research*, 42(28), 3059–3074.
- 917 Summerfield, C., & Egner, T. (2009). Expectation (and attention) in visual cognition. *Trends*  
918 *in Cognitive Sciences*, 13(9), 403–409.
- 919 Talsma, D., Kok, A., Slagter, H. A., & Cipriani, G. (2008). Attentional orienting across the  
920 sensory modalities. *Brain and Cognition*, 66(1), 1–10.
- 921 van Ede, F., de Lange, F. P., & Maris, E. (2012). Attentional cues affect accuracy and  
922 reaction time via different cognitive and neural processes. *The Journal of Neuroscience*,  
923 32(30), 10408–10412.
- 924 Vossel, S., Thiel, C. M., & Fink, G. R. (2006). Cue validity modulates the neural correlates of  
925 covert endogenous orienting of attention in parietal and frontal cortex. *NeuroImage*, 32(3),  
926 1257–1264.
- 927 Wahn, B., & König, P. (2015). Audition and vision share spatial attentional resources, yet  
928 attentional load does not disrupt audiovisual integration. *Frontiers in Psychology*, 6(July), 1–  
929 12.
- 930 Wahn, B., & König, P. (2017). Is attentional resource allocation across sensory modalities  
931 task-dependent? *Advances in Cognitive Psychology*, 13(1), 83–96.
- 932 Ward, L. M., McDonald, J. J., & Lin, D. (2000). On asymmetries in cross-modal spatial  
933 attention orienting. *Perception & Psychophysics*, 62(6), 1258–1264.
- 934 Warm, J. S., Stutz, R. M., & Vassolo, P. A. (1975). Intermodal transfer in temporal  
935 discrimination. *Perception & Psychophysics*, 18(4), 281–286.
- 936 Zuanazzi, A., & Noppeney, U. (2018). Additive and interactive effects of spatial attention  
937 and expectation on perceptual decisions. *Scientific Reports*, 1–12.

938 Zuanazzi, A., & Noppeney, U. (2019). Distinct neural mechanisms of spatial attention and  
939 expectation guide perceptual inference in a multisensory world. *The Journal of Neuroscience*,  
940 39(12), 2873–18.

941 Zuanazzi, A., & Noppeney, U. (2020). The intricate interplay of spatial attention and  
942 expectation: a multisensory perspective. *Multisensory Research*, 33(4–5), 383–416.
